# Supplementary material for: Bereavement care interventions: a systematic review
Source: PubMed Central journal article supplement (PMC503393; doi:10.1186/1472-684x-3-3), 2004-07-26
Supplement: 1472-684X-3-3-S1.pdf [file 1472-684X-3-3-S1.pdf]

## BEREAVEMENT INTERVENTION SYSTEMATIC REVIEW: LIST OF REFERENCES FOUND, AND ADDITIONAL REFERENCES USED

### 1970 (1)

1. Kuhn T: **The structure of scientific revolutions**, 2nd edn. Chicago: University of Chicago Press; 1970.

### 1975 (2)

1. Gerber I, Wiener A, Battin D, Arkin A: **Brief therapy for the bereaved**. In: *Bereavement: Its psychosocial aspects*. Edited by Shoenberg B, Gerber I. New York: Columbia University Press; 1975: 310-333.
2. Polak PR, Egan D, Vandenberg R, Williams WV: **Prevention in mental health: a controlled study**. *American Journal of Psychiatry* 1975, **132**(2):146-149.

### 1976 (1)

1. Williams WV, Lee J, Polak PR: **Crisis intervention: effects of crisis intervention on family survivors of sudden death situations**. *Community Mental Health Journal* 1976, **12**(2):128-136.

### 1977 (2)

1. Anonymous: **Newcastle survey of deaths in early childhood 1974/76, with special reference to sudden unexpected deaths. Working party for early childhood deaths in Newcastle**. *Archives of Disease in Childhood* 1977, **52**(11):828-835.
2. Raphael B: **Preventive intervention with the recently bereaved**. *Archives of General Psychiatry* 1977, **34**(12):1450-1454.

### 1978 (1)

1. Barrett AV: **Effectiveness of widows' groups in facilitating change**. *Journal of Consulting and Clinical Psychology* 1978, **46**(1):20-31.

### 1979 (2)

1. Fleck L: **Genesis and development of a scientific fact**. Chicago: University Press; 1979.
2. Williams WV, Polak PR: **Follow-up research in primary prevention: a model of adjustment in acute grief**. *Journal of Clinical Psychology* 1979, **35**(1):35-45.

### 1980 (3)

1. Miles MS: **The effects of a course on death and grief on nurses' attitudes toward dying patients and death.** *Death Education* 1980, **4**(3):245-260.
2. Parkes CM: **Bereavement counselling: does it work?** *Br Med J* 1980, **281**(6232):3-6.
3. Vachon ML, Lyall WA, Rogers J, Freedman-Letofsky K, Freeman SJ: **A controlled study of self-help intervention for widows.** *American Journal of Psychiatry* 1980, **137**(11):1380-1384.

**1981** (3)

1. Aries P: **The Hour of Our Death.** Oxford: Oxford University Press; 1981.
2. Dimond M: **Bereavement and the elderly: a critical review with implications for nursing practice and research.** *Journal of Advanced Nursing* 1981, **6**(6):461-470.
3. Mawson D, Marks I, Ramm L, Stern R: **Guided mourning for morbid grief: a controlled study.** *British Journal of Psychiatry* 1981, **138**:185-193.

**1982** (2)

1. Forrest GC, Standish E, Baum JD: **Support after perinatal death: a study of support and counselling after perinatal bereavement.** *British Medical Journal Clinical Research Ed* 1982, **285**(6353):1475-1479.
2. Rogers J, Sheldon A, Barwick C, Letofsky K, Lancee W: **Help for families of suicide: survivors support program.** *Canadian Journal of Psychiatry - Revue Canadienne de Psychiatrie* 1982, **27**(6):444-449.

**1983** (1)

1. Segantini A, Carnelli V, Portaleone D, Zerbi Schwartz L, Falzi G, Salice P, Schwartz PJ, Careddu P: **Sudden infant death syndrome in Italy. A multidisciplinary approach.** *Pediatrica Medica e Chirurgica* 1983, **5**(3):57-60.

**1984** (2)

1. Horowitz MJ, Weiss DS, Kaltreider N, Krupnick J, Marmar C, Wilner N, DeWitt K: **Reactions to the death of a parent. Results from patients and field subjects.** *Journal of Nervous & Mental Disease* 1984, **172**(7):383-392.
2. Persson G, Alstrom JE, Nordlund CL: **Prognostic factors with four treatment methods for phobic disorders.** *Acta Psychiatrica Scandinavica* 1984, **69**(4):307-317.

**1985** (2)

1. Videka-Sherman L, Lieberman M: **The effects of self-help and psychotherapy intervention on child loss: the limits of recovery.** *American Journal of Orthopsychiatry* 1985, **55**(1):70-82.

2. Walls N, Meyers AW: **Outcome in group treatments for bereavement: experimental results and recommendations for clinical practice.** *International Journal of Mental Health* 1985, **13**(3-4):126-147.

#### 1986 (5)

1. Kane R, Klein S, Bernstein L, Rothenberg R: **The role of hospice in reducing the impact of bereavement.** *Journal of Chronic Diseases* 1986, **39**(9):735-742.
2. Lieberman MA, Videka-Sherman L: **The impact of self-help groups on the mental health of widows and widowers.** *American Journal of Orthopsychiatry* 1986, **56**(3):435-449.
3. Murphy SA: **Stress, Coping, and Mental Health Outcomes Following a Natural Disaster: Bereaved Family Members and Friends Compared.** *Death Studies* 1986.
4. O'Neil MK, Lancee WJ, Freeman SJ: **Psychosocial factors and depressive symptoms.** *Journal of Nervous & Mental Disease* 1986, **174**(1):15-23.
5. Warnes H: **Alexithymia, clinical and therapeutic aspects.** *Psychotherapy & Psychosomatics* 1986, **46**(1-2):96-104.

#### 1987 (7)

1. Burgess C: **Stress and cancer.** *Cancer Surveys* 1987, **6**(3):403-416.
2. Dyregrov A, Matthiesen SB: **Similarities and Differences in Mothers' and Fathers' Grief following the Death of an Infant.** *Scandinavian Journal of Psychology* 1987.
3. Jacobs SC, Nelson JC, Zisook S: **Treating depressions of bereavement with antidepressants: a pilot study.** *Psychiatric Clinics of North America* 1987, **10**(3):501-510.
4. Kleber RJ, Brom D: **Psychotherapy and pathological grief controlled outcome study.** *Israel Journal of Psychiatry & Related Sciences* 1987, **24**(1-2):99-109.
5. Lehman DR, Wortman CB, Williams AF: **Long-term effects of losing a spouse or child in a motor vehicle crash.** *Journal of Personality & Social Psychology* 1987, **52**(1):218-231.
6. Steinberg JA, Silverman MM (eds.): **Preventing mental disorders: A research perspective;** 1987.
7. Wasow M, Coons DH: **Widows and Widowers of Alzheimer's Victims: Their Survival after Spouses' Death.** *Journal of Independent Social Work* 1987, **2**(2):21-32.

#### 1988 (6)

1. Constantino RE: **Comparison of two group interventions for the bereaved.** *Image - the Journal of Nursing Scholarship* 1988, **20**(2):83-87.
2. Gottlieb BH (ed.): **Marshaling social support: Formats, processes, and effects;** 1988.

3. Haggmark C, Theorell T: **Evaluation of an activation programme: repeated observations of mental exhaustion, anxiety and depression in relatives of cancer patients.** *Scand J Caring Sci* 1988, **2**(3):129-141.
4. Kenner CA: **Parent transition from the newborn intensive care unit (NICU) to home.** *D.n.s.:* INDIANA UNIVERSITY SCHOOL OF NURSING; 1988.
5. Marmar C, Horowitz M, Weiss D, Wilner N, Kaltreider N: **A controlled trial of brief psychotherapy and mutual-help group treatment of conjugal bereavement.** *American Journal of Psychiatry* 1988, **145**(2):203-209.
6. Sireling L CD, Marks I: **Guided mourning for morbid grief: A controlled replication.** *Behavior Therapy* 1988, **19**(2):121-132.

#### 1989 (7)

1. Carroll RM: **The relationship of bereaved parental distress, coping, family functioning, cohesiveness and spousal support with infant death.** *Ph.d.:* UNIVERSITY OF MARYLAND AT BALTIMORE; 1989.
2. Fuller RL, Geis SB, Rush J: **Lovers and significant others.** In: *Disenfranchised grief: Recognizing hidden sorrow (pp 33-42).* Edited by Doka KJ, vol. xvi,; 1989: 347.
3. Kim CJ, Yoo JS, Park JW: **The effect of crisis intervention by the visiting nurse with cancer patients.** *Kanho Hakhoe Chi [Journal of Nurses Academic Society]* 1989, **19**(1):63-80.
4. Maton KI: **The Stress-Buffering Role of Spiritual Support: Cross-Sectional and Prospective Investigations.** *Journal for the Scientific Study of Religion* 1989, **28**(3):310-323.
5. Mulligan JCA: **Dying at home: an evaluation of a specialist home care service.** *Ph.d.:* UNIVERSITY OF WALES (UNITED KINGDOM); 1989.
6. Ramsey CN, Jr. (ed.): **Family systems in medicine;** 1989.
7. Reich JW, Zautra AJ: **A perceived control intervention for at-risk older adults.** *Psychology & Aging* 1989, **4**(4):415-424.

#### 1990 (7)

1. Ahmedzai S: **Measuring quality of life in hospice care.** *Oncology (Huntington)* 1990, **4**(5):115-119; discussion 129.
2. Clark EJ: **Sociological Approaches to Illness and Loss.** In.: International Sociological Association; 1990.
3. Gordon SB: **Adolescent sexuality: Treatment of the sleeper effects of sexual abuse.** In: *Adolescent behavior therapy handbook Springer series on behavior therapy and behavioral medicine, (pp 233-252).* Edited by Feindler EL, Kalfus GR, vol. 22; 1990: 459.
4. Koomen W, Kniesmeijer T, Vospanhuijsen A, Velthuijsen AS: **Social Support and Well-Being in Heart-Patients - a Longitudinal-Study of the Combined Role of Need for Social Support and Perceived Social Support.** *Social Behaviour* 1990, **5**(5):297.

5. McCallum M, Piper W: **A controlled study of effectiveness and patient suitability for short-term group psychotherapy.** *International Journal of Group Psychotherapy* 1990, **40**(4):431-452.
6. Schonfeld DJ, Kappelman M: **The impact of school-based education on the young child's understanding of death.** *Journal of Developmental & Behavioral Pediatrics* 1990, **11**(5):247-252.
7. Welch M: **Trauma recovery: an ethnography.** *Ph.d.:* THE UNIVERSITY OF CONNECTICUT; 1990.

#### 1991 (10)

1. Birnbaum A: **Haven Hugs & Bugs. An innovative multiple-family weekend intervention for bereaved children, adolescents and adults.** *American Journal of Hospice & Palliative Care* 1991, **8**(5):23-29.
2. Finlay I, Dallimore D: **Your child is dead.** *BMJ* 1991, **302**(6791):1524-1525.
3. Geyer S: **Life events prior to manifestation of breast cancer: a limited prospective study covering eight years before diagnosis.** *Journal of Psychosomatic Research* 1991, **35**(2-3):355-363.
4. Haggmark C, Bachner M, Theorell T: **A follow-up of psychological state in relatives of cancer patients one year after the patient's death: effects of an activation program.** *Acta Oncol* 1991, **30**(6):677.
5. He M: **A prospective controlled study of psychosomatic and immunologic change in recently bereaved people.** *Chung-Hua Shen Ching Ching Shen Ko Tsa Chih [Chinese Journal of Neurology & Psychiatry]* 1991, **24**(2):90-93, 124.
6. Levenson JL, Bemis C: **The role of psychological factors in cancer onset and progression.** *Psychosomatics* 1991, **32**(2):124-132.
7. Lewis MA, Hatton CL, Salas I, Leake B, Chiofalo N: **Impact of the Children's Epilepsy Program on parents.** *Epilepsia* 1991, **32**(3):365-374.
8. Pasternak RE, Reynolds CF, 3rd, Schlernitzauer M, Hoch CC, Buysse DJ, Houck PR, Perel JM: **Acute open-trial nortriptyline therapy of bereavement-related depression in late life.** *Journal of Clinical Psychiatry* 1991, **52**(7):307-310.
9. Robinson JH: **A descriptive study of widows' grief responses, coping processes and social support within Roy's adaptation framework.** *Ph.d.:* WAYNE STATE UNIVERSITY; 1991.
10. West SG, Sandler I, Pillow DR, Baca L, Gersten JC: **The use of structural equation modeling in generative research: toward the design of a preventive intervention for bereaved children.** *American Journal of Community Psychology* 1991, **19**(4):459-480.

#### 1992 (21)

1. Addington-Hall JM, MacDonald LD, Anderson HR, Chamberlain J, Freeling P, Bland JM, Raftery J: **Randomised controlled trial of effects of coordinating care for terminally ill cancer patients.** *BMJ* 1992, **305**(6865):1317-1322.
2. Anonymous: **Suspect screening.** *Priorities for Health* 1992, **4**(4):31.

3. Bartrop RW, Hancock K, Craig A, Porritt DW: **Psychological Toxicity of Bereavement - 6 Months after the Event.** *Aust Psychol* 1992, **27**(3):192.
4. Davis JM, Hoshiko BR, Jones S, Gosnell D: **The effect of a support group on grieving individuals' levels of perceived support and stress.** *Archives of Psychiatric Nursing* 1992, **6**(1):35-39.
5. Glass TA, Maddox GL: **The quality and quantity of social support: stroke recovery as psycho-social transition.** *Social Science & Medicine* 1992, **34**(11):1249-1261.
6. Hanson C, Strawser D: **Family presence during cardiopulmonary resuscitation: Foote Hospital emergency department's nine-year perspective.** *Journal of Emergency Nursing* 1992, **18**(2):104-106.
7. Lieberman MA, Yalom I: **Brief group psychotherapy for the spousally bereaved: a controlled study.** *International Journal of Group Psychotherapy* 1992, **42**(1):117-132.
8. Murrell SA, Norris FH, Chipley QT: **Functional Versus Structural Social Support, Desirable Events, and Positive Affect in Older Adults.** *Psychol Aging* 1992, **7**(4):562.
9. Nursten J: **Process following Disaster Work.** *Journal of Social Work Practice* 1992, **6**(2):151-158.
10. Opie ND, Goodwin T, Finke LM, Beattley JM, Lee B, van Epps J: **The effect of a bereavement group experience on bereaved children's and adolescents' affective and somatic distress.** *Journal of Child & Adolescent Psychiatric & Mental Health Nursing* 1992, **5**(1):20-26.
11. Piper WE, McCallum M, Azim HFA: **Adaptation to loss through short-term group psychotherapy;** 1992.
12. Provencio-Vasquez E: **Creating paths: living with a very low birth weight infant.** *Ph.d.:* THE UNIVERSITY OF ARIZONA; 1992.
13. Reynolds CF, 3rd: **Treatment of depression in special populations.** *Journal of Clinical Psychiatry* 1992, **53**(Suppl):45-53.
14. Sandler IN, West SG, Baca L, Pillow DR, Gersten JC, Rogosch F, Virdin L, Beals J, Reynolds KD, Kallgren C *et al*: **Linking empirically based theory and evaluation: the Family Bereavement Program.** *American Journal of Community Psychology* 1992, **20**(4):491-521.
15. Schilling RF, Koh N, Abramovitz R, Gilbert L: **Bereavement Groups for Inner-City Children.** *Research on Social Work Practice* 1992, **2**(3):405.
16. Sherr L, Hedge B, Steinhart K, Davey T, Petrack J: **Unique patterns of bereavement in HIV: implications for counselling.** *Genitourinary Medicine* 1992, **68**(6):378-381.
17. Snow RW, Armstrong JRM, Forster D, Winstanley MT, Marsh VM, Newton C, Waruiru C, Mwangi I, Winstanley PA, Marsh K: **Childhood Deaths in Africa - Uses and Limitations of Verbal Autopsies.** *Lancet* 1992, **340**(8815):351.
18. Solomon SD, Gerrity ET, Muff AM: **Efficacy of Treatments for Posttraumatic-Stress-Disorder - an Empirical Review.** *JAMA-J Am Med Assoc* 1992, **268**(5):633.
19. Teel CSH: **Grief, recurrent sorrow, and depression among caregivers and bereaved.** *Ph.d.:* THE UNIVERSITY OF ARIZONA; 1992.

20. Tudiver F, Hilditch J, Permaul J, McKendree D: **Does mutual help facilitate newly bereaved widowers? Report of a randomized controlled trial.** *Evaluation & the Health Professions* 1992, **15**(2):147-162.
21. Zambelli GC, DeRosa AP: **Bereavement support groups for school-age children: theory, intervention, and case example.** *American Journal of Orthopsychiatry* 1992, **62**(4):484-493.

**1993** (15)

1. Adamowski K, Dickinson G, Weitzman B, Roessler C, Carter-Snell C: **Sudden unexpected death in the emergency department: caring for the survivors.** *CMAJ Canadian Medical Association Journal* 1993, **149**(10):1445-1451.
2. Appleton R, Gibson B, Hey E: **The loss of a baby at birth: the role of the bereavement officer.[comment].** *British Journal of Obstetrics & Gynaecology* 1993, **100**(1):51-54.
3. Caserta MS, Lund DA: **Intrapersonal Resources and the Effectiveness of Self-Help Groups for Bereaved Older Adults.** *Gerontologist* 1993, **33**(5):619.
4. Edmands MS: **Critique of Bereavement reactions among homosexual men experiencing multiple losses in the AIDS epidemic [original article by Neugebauer R et al appears in AM J PSYCHIATR 1992;149(10):1374-9].** *Nursing Scan in Research* 1993, **6**(5):20-21.
5. Kay M, Guernsey de Zapien J, Wilson C, Yoder M: **Evaluating treatment efficacy by triangulation.** *Social Science & Medicine* 1993, **36**(12):1545-1554.
6. Levy LH, Derby JF, Martinkowski KS: **Effects of membership in bereavement support groups on adaptation to conjugal bereavement.** *American Journal of Community Psychology* 1993, **21**(3):361-381.
7. Lipsey M: **Theory as method: small theories of treatment.** *New Directions for Program Evaluation* 1993, **57**:5-38.
8. McCallum M, Piper WE, Morin H: **Affect and outcome in short-term group therapy for loss.** *International Journal of Group Psychotherapy* 1993, **43**(3):303-319.
9. Pelletier ML: **The needs of family members of organ and tissue donors.** *Heart & Lung: Journal of Acute & Critical Care* 1993, **22**(2):151-157.
10. Pickett M: **Cultural awareness in the context of terminal illness.** *Cancer Nursing* 1993, **16**(2):102-106.
11. Quarmby D: **Peer group counselling with bereaved adolescents.** *British Journal of Guidance and Counseling* 1993, **21**(2):196-211.
12. Rajaram SS, Garrity TF, Stallones L, Marx MB: **Bereavement Loss of a Pet and Loss of a Human.** *Anthrozoos* 1993, **6**(1):8.
13. Robbins RA, McLaughlin NR, Nye-Dameshek J: **Knowledge and beliefs about donation -- I: Asking the experts.** *Journal of Transplant Coordination* 1993, **3**(1):7-13.
14. Short A: **GIM during pregnancy: anticipation and resolution.** *Journal of the Association for Music & Therapy* 1993, **2**:273-287.

15. Surtees PG, Miller PM: **Partners in adversity: I. Study design and context.** *European Archives of Psychiatry & Clinical Neuroscience* 1993, **242**(4):224-232.

#### **1994** (13)

1. Bledsoe CM: **Factors influencing the decision of families to donate organs.** *Ph.d.*: THE UNIVERSITY OF UTAH; 1994.
2. Crown S, Freeman HL (eds.): **The book of psychiatric books**; 1994.
3. Fabrega H, Jr., Nutini H: **Sudden infant and child death as a cultural phenomenon: a Tlaxcalan case study.** *Psychiatry* 1994, **57**(3):225-243.
4. Feld S, George LK: **Moderating effects of prior social resources on the hospitalizations of elders who become widowed.** *Journal of Aging & Health* 1994, **6**(3):275-295.
5. Hanson JL, Ashley B: **Advanced practice nurses' application of the Stetler model for research utilization: improving bereavement care.** *Oncology Nursing Forum* 1994, **21**(4):720-724.
6. Hays JC, Kasl S, Jacobs S: **Past personal history of dysphoria, social support, and psychological distress following conjugal bereavement.** *Journal of the American Geriatrics Society* 1994, **42**(7):712-718.
7. Kanhai Humphrey HH, Geerinck-Vercammen C, De Haan M, Van Der Ploeg Henk M, Van Zanten Loes A, Bennebroek-Gravenhorst J: **Follow-up of pregnancies, infants, and families after multifetal pregnancy reduction.** *Fertility & Sterility* 1994, **62**(5):955-959.
8. Lilford RJ, Stratton P, Godsil S, Prasad A: **A randomised trial of routine versus selective counselling in perinatal bereavement from congenital disease.** *British Journal of Obstetrics & Gynaecology* 1994, **101**(4):291-296.
9. Mancoske RJ, Standifer D, Cauley C: **The Effectiveness of Brief Counseling-Services for Battered Women.** *Research on Social Work Practice* 1994, **4**(1):53.
10. Orton M: **A Case-Study of an Adolescent Mother Grieving the Death of Her Child Due to Sudden-Infant-Death-Syndrome.** *Am J Art Ther* 1994, **33**(2):37.
11. Pasternak RE, Reynolds CF, Houck PR, Schlernitzauer M, Buysse DJ, Hoch CC, Kupfer DJ: **Sleep in Bereavement-Related Depression During and after Pharmacotherapy with Nortriptyline.** *J Geriatr Psychiatry Neurol* 1994, **7**(2):69.
12. Schneiderman G, Winders P, Tallett S, Feldman W: **Do child and/or parent bereavement programs work?** *Canadian Journal of Psychiatry - Revue Canadienne de Psychiatrie* 1994, **39**(4):215-218.
13. Steptoe A, Wardle J (eds.): **Psychosocial processes and health: A reader**; 1994.

#### **1995** (20)

1. Akers MC: **Transition readiness, grief work, psychological symptom distress and maternal adaptation as components of a life transition.** *D.n.sc.*: THE CATHOLIC UNIVERSITY OF AMERICA; 1995.



2. Balk DE: **Bereavement Research Using Control Groups: Ethical Obligations and Questions.** *Death Studies* 1995, **19**(2):123-138.
3. Bean NM: **Stranger in our home: Rural families talk about the experience of having received in-home family services.** *Dissertation Abstracts International* 1995, **55**(9-A):2986.
4. Blackwelder NL: **Critical incident stress debriefing for school employees.** *Dissertation Abstracts International* 1995, **56**(4-A):1192.
5. Clark SE, Goldney RD: **Grief reactions and recovery in a support group for people bereaved by suicide.** *Crisis: Journal of Crisis Intervention & Suicide* 1995, **16**(1):27-33.
6. Czupek DA: **Physician and family factors which influence the consent process in pediatric organ donation.** *Dissertation Abstracts International: Section B: the Sciences & Engineering* 1995, **55**(8-B):3563.
7. Dieckmann RA, Vardis R: **High-Dose Epinephrine in Pediatric out-of-Hospital Cardiopulmonary Arrest.** *Pediatrics* 1995, **95**(6):901.
8. Glajchen M, Magen R: **Evaluating process, outcome, and satisfaction in community-based cancer support groups.** *Support Groups: Current Perspective on Theory and Practice* 1995, **18**:27-40.
9. Granger CE, George C, Shelly MP: **The management of bereavement on intensive care units.** *Intensive Care Medicine* 1995, **21**(5):429-436.
10. Heiney SP, Ruffin J, Goon-Johnson K: **The effects of a support group on selected psychosocial outcomes of bereaved parents whose child died from cancer.** *Journal of Pediatric Oncology Nursing* 1995, **12**(2):51-58; discussion 59-61.
11. Jensen BJA: **Caregiver responses to a theoretically based intervention program: case study analysis.** *Ph.d.: THE UNIVERSITY OF TEXAS AT AUSTIN*; 1995.
12. Klockevold B: **Multi-media: herbal videos.** *American Herb Association Quarterly Newsletter* 1995, **11**(3):13.
13. Reichenberg-Ullman J: **The case of the dream warrior.** *Small Remedies & Interesting Cases: Professional Case Conferences* 1995, **2**:271-282.
14. Robinson JH: **Grief responses, coping processes, and social support of widows: research with Roy's model.** *Nursing Science Quarterly* 1995, **8**(4):158-164.
15. Schnyder U: **[Family-based crisis intervention after attempted suicide].** *Nervenarzt* 1995, **66**(7):554-560.
16. Schreiner-Engel P, Walther Virginia N, Mindes J, Lynch L, Berkowitz Richard L: **First-trimester multifetal pregnancy reduction: Acute and persistent psychologic reactions.** *American Journal of Obstetrics & Gynecology* 1995, **172**(2 PART 1):541-547.
17. Sikkema KJ, Kalichman SC, Kelly JA, Koob JJ: **Group intervention to improve coping with AIDS-related bereavement: model development and an illustrative clinical example.** *AIDS Care* 1995, **7**(4):463-475.
18. Tarockova T: **Grief Counseling as an Emerging Sphere of Psychological Counseling.** *Cesk Psychol* 1995, **39**(3):229.

19. Thayre K: **Never going to be easy: giving bad news.** *Nursing Standard* 1995, **9(50)**:RCN Nurs Update: 3-12.
20. Tudiver F, Permaul-Woods J, Hilditch J, Harmina J, Saini S: **Do widowers use the health care system differently? Does intervention make a difference?** *Canadian Family Physician* 1995, **41**:392-400.

**1996** (18)

1. Brown KLG: **Grief as a basic conditioning factor affecting the self-care agency and self-care of family caregivers of persons with neurotrauma.** *Ph.d.*: WAYNE STATE UNIVERSITY; 1996.
2. Della Selva PC: **Intensive short-term dynamic psychotherapy: Theory and technique;** 1996.
3. Erwin KT: **Group techniques for aging adults: Putting geriatric skills enhancement into practice;** 1996.
4. Forte JA, Barrett AV, Campbell MH: **Patterns of social connectedness and shared work: a symbolic interactionist perspective.** *Social Work with Groups* 1996, **19(1)**:29-51.
5. Garcia-Garcia JA, Landa Petralanda V, Trigueros Manzano MC, Calvo Aedo P, Gaminde Inda I: **Grief for loss of a spouse: a study with discussion groups in primary care.** *Atencion Primaria* 1996, **18(9)**:475-479.
6. Green J: **Mothers in "Incest Families": A Critique of Blame and Its Destructive Sequels.** *Violence Against Women* 1996, **2(3)**:322-348.
7. Krongrad A, Lai H, Burke MA, Goodkin K, Lai SH: **Marriage and mortality in prostate cancer.** *J Urol* 1996, **156(5)**:1696.
8. Leavitt KS, Morrison JA, Gardner SA, Gallagher MM: **Group play therapy for cumulatively traumatized child survivors of familial AIDS.** *International Journal of Play Therapy* 1996, **5(1)**:1-17.
9. Lee C, Slade P: **Miscarriage as a traumatic event: a review of the literature and new implications for intervention.** *Journal of Psychosomatic Research* 1996, **40(3)**:235-244.
10. Lev EL, Owen SV: **A measure of self-care self-efficacy... Strategies Used by People to Promote Health (SUPPH).** *Research in Nursing & Health* 1996, **19(5)**:421-429.
11. Light L: **Healing with homeopathy.** *Vegetarian Times* 1996, **Oct(230)**:104-106.
12. McCreight BH: **A comparative study of two types of group therapy for adult female survivors of childhood sexual abuse.** *Dissertation Abstracts International: Section B: the Sciences & Engineering* 1996, **56(11-B)**:6399.
13. Moore K: **Effects of a brief task-focused intervention on the bereavement outcome of mid-life widows.** *Dissertation Abstracts International* 1996, **56(11-A)**:4283.
14. Mundt C: **Psychotherapy of depression: The theoretical background and its practical consequences.** *Nervenarzt* 1996, **67(3)**:183.
15. Murphy SA, Baugher R, Lohan J, Scheideman J, Heerwagen J, Johnson LC, Tillery L, Grover MC: **Parents' evaluation of a preventive intervention**

- following the sudden, violent deaths of their children. *Death Studies* 1996, **20**(5):453-468.
16. Nielsen S HM, Moller A, Granberg S: **Bereavement, grieving and psychological morbidity after first trimester spontaneous abortion: comparing expectant management with surgical evacuation.** *Human Reproduction* 1996, **11**(8):1767-1770.
  17. Pohle MS: **Battered women: Self-definition.** *Dissertation Abstracts International: Section B: the Sciences & Engineering* 1996, **57**(5-B):3418.
  18. Tonkins S, Lambert M: **A treatment outcome study of bereavement groups for children.** *Child and Adolescent Social Work Journal* 1996, **13**(1):3-21.
- 1997** (21)
1. Anonymous: **Natural killer cells need sleep.** *Oriental Medicine Journal* 1997, **6**(3/4):8-9.
  2. Anthony KH: **Bitter Homes and Gardens: The Meanings of Home to Families of Divorce.** *Journal of Architectural & Planning Research* 1997, **14**(1):1-19.
  3. Beale MQ: **A study of the function and meaning of imagery experienced by rape survivors.** *Dissertation Abstracts International* 1997, **57**(8-A):3678.
  4. Eick SE: **A bereavement support group for family hospice of Indiana County.** *Dissertation Abstracts International: Section B: the Sciences & Engineering* 1997, **58**(1-B):0415.
  5. Frank E, Prigerson Holly G, Shear MK, Reynolds Charles F, III: **Phenomenology and treatment of bereavement-related distress in the elderly.** *International Clinical Psychopharmacology* 1997, **12**(SUPPL. 7):S25-S29.
  6. Kavanaugh K: **Parents' experience surrounding the death of a newborn whose birth is at the margin of viability.** *JOGNN - Journal of Obstetric, Gynecologic, & Neonatal Nursing* 1997, **26**(1):43-51.
  7. Kissane DW, McKenzie DP, Bloch S: **Family coping and bereavement outcome.** *Palliative Medicine* 1997, **11**(3):191-201.
  8. Kissane DW, Bloch S, Miach P, Smith GC, Seddon A, Keks N: **Cognitive-existential group therapy for patients with primary breast cancer - Techniques and themes.** *Psycho-Oncology* 1997, **6**(1):25.
  9. McKibbin CL, Guarnaccia CA, Hayslip B, Jr., Murdock ME: **Locus of control perceptions among conjugally bereaved older adults: a pilot study.** *International Journal of Aging & Human Development* 1997, **44**(1):37-45.
  10. Murphy SA: **A bereavement intervention for parents following the sudden, violent deaths of their 12-28-year-old children: description and applications to clinical practice.** *Canadian Journal of Nursing Research* 1997, **29**(4):51-72.
  11. Murphy K, Hanrahan P, Luchins D: **A survey of grief and bereavement in nursing homes: the importance of hospice grief and bereavement for the end-stage Alzheimer's disease patient and family.[comment].** *Journal of the American Geriatrics Society* 1997, **45**(9):1104-1107.

12. Neugebauer R, Kline J, Shrout P, Skodol A, Oconnor P, Geller PA, Stein Z, Susser M: **Major depressive disorder in the 6 months after miscarriage.** *JAMA-J Am Med Assoc* 1997, **277**(5):383.
13. Oates WE: **Reconciling with unfulfilled dreams at the end of life.** In: *The aging family: New visions in theory, practice, and reality (pp 259-269) xi.* Edited by Hargrave TD, Hanna SM; 1997: 321.
14. Prince MJ, Harwood RH, Blizard RA, Thomas A, Mann AH: **Social support deficits, loneliness and life events as risk factors for depression in old age. The Gospel Oak Object .6.** *Psychological Medicine* 1997, **27**(2):323.
15. Rashotte J, Fothergill-Bourbonnais F, Chamberlain M: **Pediatric intensive care nurses and their grief experiences: a phenomenological study.** *Heart & Lung: Journal of Acute & Critical Care* 1997, **26**(5):372-386.
16. Reviews NHSCf, Dissemination: **Patient and carer preference for, and satisfaction with, specialist models of palliative care.** *Evidence Based Medicine Jul Aug* 1997, **2**:123.
17. Schaap AH, Wolf H, Bruinse HW, Barkhof-van de Lande S, Treffers PE: **Long-term impact of perinatal bereavement. Comparison of grief reactions after intrauterine versus neonatal death.** *European Journal of Obstetrics, Gynecology, & Reproductive Biology* 1997, **75**(2):161-167.
18. Sowden AJ, Tilford S, Delaney F, Vogels M, Gilbody S, Sheldon TA: **Mental health promotion in high risk groups.** *Qual Health Care* 1997, **6**(4):219.
19. Van Epps J, Opie ND, Goodwin T: **Themes in the bereavement experience of inner city adolescents.** *Journal of Child & Adolescent Psychiatric Nursing* 1997, **10**(1):25-36.
20. Wolchik SA, Sandler IN (eds.): **Handbook of children's coping: Linking theory and intervention;** 1997.
21. Wolfson L, Miller M, Houck P, Ehrenpreis L, Stack JA, Frank E, Cornes C, Mazumdar S, Kupfer DJ, Reynolds CF: **Foci of interpersonal psychotherapy (IPT) in depressed elders: Clinical and outcome correlates in a combined IPT/nortriptyline protocol.** *Psychother Res* 1997, **7**(1):45.

## 1998 (30)

1. Addington-Hall J WLJCKSMM: **A randomised controlled trial of postal versus interviewer administration of a questionnaire measuring satisfaction with, and use of, services received in the year before death.** *Journal of Epidemiology & Community Health* 1998, **52**(12):802-807.
2. Balk DE, Lampe S, Sharpe B, Schwinn S, Holen K, Cook L, Dubois R, 3rd: **TAT results in a longitudinal study of bereaved college students.** *Death Studies* 1998, **22**(1):3-21.
3. Bonanno GA NC, Gunzerath L, Keltner D, Horowitz MJ: **Interpersonal ambivalence, perceived relationship adjustment, and conjugal loss.** *Journal of Consulting & Clinical Psychology* 1998, **66**(6):1012-1022.
4. Burkhalter JE: **A bereavement support group intervention: Effects on bereavement-specific situational coping and associations of dispositional coping style and situational coping with psychological distress and immune function in bereaved hiv seronegative and seropositive gay men.**

- Dissertation Abstracts International: Section B: the Sciences & Engineering* 1998, **59**(2-B):0865.
5. Daaleman TP, Frey B: **Prevalence and patterns of physician referral to clergy and pastoral care providers.** *Archives of Family Medicine* 1998, **7**(6):548-553.
  6. Goodkin K, Feaster Daniel J, Asthana D, Blaney Nancy T, Kumar M, Baldewicz T, Tuttle Raymond S, Maher Kevin J, Baum Marianna K, Shapshak P *et al*: **A bereavement support group intervention is longitudinally associated with salutary effects on the CD4 cell count and number of physician visits.** *Clinical & Diagnostic Laboratory Immunology* 1998, **5**(3):382-391.
  7. Gould D: **Grief after pregnancy loss was predicted by length of pregnancy, neuroticism, psychiatric symptoms, and absence of other children [commentary on Janssen HJ, Cuisinier MC, de Graauw KP, et al. A prospective study of risk factors predicting grief intensity following pregnancy loss. ARCH GEN PSYCHIATRY 1997 Jan;54:56-61].** *Evidence-Based Nursing* 1998, **1**(2):54.
  8. Hunter S, Grimmer M, Wayne B, Carter H: **Palliative care in Forth Valley: perspective of community nursing providers on service and education needs.** *Health Bulletin* 1998, **56**(1):511-517.
  9. Jones BL: **Integrating hearing loss was a complex and dynamic process for patients [commentary on Herth K. Integrating hearing loss into one's life. QUAL HEALTH RES 1998;8(2):207-23].** *Evidence-Based Nursing* 1998, **1**(4):131.
  10. Kauffmann E: **Parents experienced cycles of defining and managing adversity in caring for a child with a chronic progressive illness [commentary on Gravelle AM. Caring for a child with a progressive illness during the complex chronic phase: parents' experience of facing adversity. J ADV NURS 1997;25(4):738-45].** *Evidence-Based Nursing* 1998, **1**(1):28.
  11. Lasser R, Siegel E, Dukoff R, Sunderland T: **Diagnosis and treatment of geriatric depression.** *CNS Drugs* 1998, **9**(1):17.
  12. Liebert DT: **The married widow: A correlational study of grief and social support networks amongst non-residential spouses of long-term care nursing home residents.** *Dissertation Abstracts International: Section B: the Sciences & Engineering* 1998, **59**(2-B):0598.
  13. Lloyd-Williams M, Wilkinson C, Lloyd-Williams FF: **Do bereaved children consult the primary health care team more frequently?** *European Journal of Cancer Care* 1998, **7**(2):120-124.
  14. Lohan JA: **Parents' perceptions of family functioning and sibling grief in families who have experienced the violent death of an adolescent or young adult child.** *Dissertation Abstracts International: Section B: the Sciences & Engineering* 1998, **59**(6-B):2682.
  15. Luscombe G, Brodaty H, Freeth S: **Younger people with dementia: diagnostic issues, effects on carers and use of services.** *International Journal of Geriatric Psychiatry* 1998, **13**(5):323-330.
  16. March JS, Amaya-Jackson L, Murray MC, Schulte A: **Cognitive-behavioral psychotherapy for children and adolescents with posttraumatic stress**

- disorder after a single-incident stressor. *J Am Acad Child Adolesc Psychiatr* 1998, **37**(6):585.
17. Metcalf L: **Solution focused group therapy: Ideas for groups in private practice, schools, agencies, and treatment programs**; 1998.
  18. Miller MD, Reynolds CF: **Nortriptyline for Grief-Related Depression in Elders**. *151st Annual Meeting of the American Psychiatric Association Toronto, Ontario, Canada 30th May 4th June 1998*(No).
  19. Mufson L, Moreau D: **Interpersonal psychotherapy for adolescent depression**. In: *Interpersonal psychotherapy review of psychiatry series (pp 35-66)* xv. Edited by Markowitz JC; 1998: 162.
  20. Murphy SA, Johnson C, Cain KC, Das Gupta A, Dimond M, Lohan J, Baugher R: **Broad-spectrum group treatment for parents bereaved by the violent deaths of their 12- to 28-year-old children: a randomized controlled trial**. *Death Studies* 1998, **22**(3):209-235.
  21. Pelletier-Hibbert M: **Coping strategies used by nurses to deal with the care of organ donors and their families**. *Heart Lung* 1998, **27**(4):230.
  22. Reynolds NR, Alonzo AA: **HIV informal caregiving: emergent conflict and growth**. *Research in Nursing & Health* 1998, **21**(3):251-260.
  23. Robinson SM, Mackenzie-Ross S, Campbell Hewson GL, Egleston CV, Prevost AT: **Psychological effect of witnessed resuscitation on bereaved relatives**. *Lancet (North American Edition)* 1998, **352**(9128):614-617.
  24. Schlernitzauer M BAJGMDPHGSJAMMDPRE, Reynolds CF, 3rd: **Recruitment methods for intervention research in bereavement-related depression. Five years' experience**. *American Journal of Geriatric Psychiatry* 1998, **6**(1):67-74.
  25. Sherman JJ: **Effects of psychotherapeutic treatments for PTSD: A meta-analysis of controlled clinical trials**. *Journal of Traumatic Stress* 1998, **11**(3):413.
  26. Snowdon C, Garcia J, Elbourne D: **Reactions of participants to the results of a randomised controlled trial: exploratory study.[comment]**. *BMJ* 1998, **317**(7150):21-26.
  27. Strydom H, Fourie J: **The Content and Evaluation of a Bereavement Counselling Programme for Parents after the Death of a Child**. *Maatskaplike Werk/Social Work* 1998, **34**(4):389-405.
  28. Tanner JL, Dechert MP, Frieden IJ: **Growing up with a facial hemangioma: parent and child coping and adaptation**. *Pediatrics* 1998, **101**(3 Pt 1):446-452.
  29. Thomas SB, Leite B, Duncan T: **Breaking the Cycle of Violence among Youth Living in Metropolitan Atlanta: A Case History of Kids Alive and Loved**. *Health Education & Behavior* 1998, **25**(2):160-174.
  30. Zygmunt M, Prigerson HG, Houck PR, Miller MD, Shear MK, Jacobs S, Reynolds CFI: **A post hoc comparison of paroxetine and nortriptyline for symptoms of traumatic grief**. *Journal of Clinical Psychiatry* 1998, **59**(5):241-245.

1999 (26)

1. Anonymous: **The Upledger Foundation update on current research projects.** *Connections Magazine* 1999, **Autumn(36):4.**
2. Beutel M, Kupfer J, Kirchmeyer P, Kehde S, Kohn FM, Schroeder-Printzen I, Gips H, Herrero HJG, Weidner W: **Treatment-related stresses and depression in couples undergoing assisted reproductive treatment by IVF or ICSI.** *Andrologia* 1999, **31(1):27.**
3. Blok GA, van Dalen J, Jager KJ, Ryan M, Wijnen RMH, Wight C, Morton JM, Morley M, Cohen B: **The European Donor Hospital Education Programme (EDHEP): addressing the training needs of doctors and nurses who break bad news, care for the bereaved, and request donation.** *Transplant International* 1999, **12(3):161.**
4. Cohen I, van Lunsen RH: **Abortion service in Amsterdam: deciding and coping in a liberal system.** *European Journal of Contraception & Reproductive Health Care* 1999, **4(1):1-6.**
5. Coleman GL: **Eye movement desensitization and reprocessing in the treatment of posttraumatic stress disorder: An investigational study of the eye movement component using a within-subject design.** *Dissertation Abstracts International: Section B: the Sciences & Engineering* 1999, **60(4-B):1846.**
6. Dent A: **Evaluation of community interventions for bereaved parents using a randomised controlled trial.** *National Research Register* 1999.
7. Dominguez ME: **The treatment of complicated mourning in children.** *Dissertation Abstracts International: Section B: the Sciences & Engineering* 1999, **60(6-B):2938.**
8. Dowdney L, Wilson R, Maughan B, Allerton M, Schofield P, Skuse D: **Psychological disturbance and service provision in parentally bereaved children: prospective case-control study.** *BMJ* 1999, **319(7206):354-357.**
9. Engler AJ: **Grief, physical symptoms, and decision-making in mothers of newborns who die. (bereavement, newborn death, coping).** *Dissertation Abstracts International: Section B: the Sciences & Engineering* 1999, **60(4-B):1528.**
10. Gess JK: **A Community Wide Study of the Hospice Referral Process.** *Dissertation Abstracts International* 1999, **60(6):2231-A.**
11. Goodkin K, Blaney NT, Feaster DJ, Baldewicz T, Burkhalter JE, Leeds B: **A randomized controlled clinical trial of a bereavement support group intervention in human immunodeficiency virus type 1-seropositive and -seronegative homosexual men.** *Archives of General Psychiatry* 1999, **56(1):52-59.**
12. Gray J, Hedge B: **Psychological distress and coping in the partners of gay men with HIV-related disease.** *Br J Health Psychol* 1999, **4:117.**
13. Grinwis AA: **Loss of the lifelong partner: Implications for social adaptation.** *Dissertation Abstracts International* 1999, **59(12-A):4498.**
14. Huss SN, Ritchie M: **Effectiveness of a group for parentally bereaved children.** *Journal for Specialists in Group Work* 1999, **24(2):186-196.**

15. Kasprzak CJ: **Multisystemic theory of post adoption services and treatment: A program design.** *Dissertation Abstracts International: Section B: the Sciences & Engineering* 1999, **60**(3-B):1303.
16. Kendrick T: **Primary care options to prevent mental illness.** *Ann Med* 1999, **31**(6):359.
17. Maddocks I: **Book reviews.** *Palliative Medicine* 1999, **13**(2):177-179.
18. Nelligan P: **A bereavement support group reduced grief and distress in bereaved, homosexual men [commentary on Goodkin K, Blaney NT, Feaster D, et al. A randomized controlled clinical trial of a bereavement support group intervention in human immunodeficiency virus type 1-seropositive and -seronegative homosexual men. ARCH GEN PSYCHIATRY 1999 Jan;56:52-9].** *Evidence-Based Nursing* 1999, **2**(4):116.
19. Reynolds C, 3rd, Miller MD, Pasternak RE, Frank E, Perel JM, Cornes C, Houck PR, Mazumdar S, Dew MA, Kupfer DJ: **Treatment of bereavement-related major depressive episodes in later life: a controlled study of acute and continuation treatment with nortriptyline and interpersonal psychotherapy.** *American Journal of Psychiatry* 1999, **156**(2):202-208.
20. Saunderson EM, Ridsdale L: **General practitioners' beliefs and attitudes about how to respond to death and bereavement: qualitative study.[comment].** *BMJ* 1999, **319**(7205):293-296.
21. Segal D, Bogaards J, Becker L, Chatman C: **Effects of emotional expression on adjustment to spousal loss among older adults.** *Journal of MENT HEALTH AGING* 1999, **5**(4):297-310.
22. Spruyt O: **Community-based palliative care for Bangladeshi patients in east London. Accounts of bereaved carers.** *Palliative Medicine* 1999, **13**(2):119-129.
23. Swanson KM: **Research-based practice with women who have had miscarriages.** *Image - the Journal of Nursing Scholarship* 1999, **31**(4):339-345.
24. Swanson KM: **Effects of caring, measurement, and time on miscarriage impact and women's well-being.** *Nurs Res* 1999, **48**(6):288.
25. Taylor M, Reynolds C, 3rd, Frank E, Dew M, Mazumdar S, Houck P, Kupfer D: **EEG sleep measures in later-life bereavement depression. A randomized, double-blind, placebo-controlled evaluation of nortriptyline.** *American Journal of Geriatric Psychiatry* 1999, **7**(1):41-47.
26. Yates P, Stetz KM: **Families' awareness of and response to dying.** *Oncology Nursing Forum* 1999, **26**(1):113-120.

## 2000 (23)

1. Adams C, Bonnett B, Meek A: **Predictors of owner response to companion animal death in 177 clients from 14 practices in Ontario.** *Journal of the American Veterinary Medical Association* 2000, **217**(9):1303-1309.
2. Carver EA: **Depression and loss: The effects of a short term bereavement support group for children and families.** *Dissertation Abstracts International: Section B: the Sciences & Engineering* 2000, **60**(11-B):5765.



3. Chambers HM, Chan FY: **Support for women/families after perinatal death.** *Cochrane Database of Systematic Reviews* 2000(2):CD000452.
4. Cote-Arsenault D, Marshall R: **One foot in -- one foot out: weathering the storm of pregnancy after perinatal loss.** *Research in Nursing & Health* 2000, **23**(6):473-485.
5. Coulthard P, Bridgman CM, Larkin A, Worthington HV: **Appropriateness of a Resuscitation Council (UK) advanced life support course for primary care dentists.** *British Dental Journal* 2000, **188**(9):507-512.
6. Cuthbertson SJ, Margetts MA, Streat SJ: **Bereavement follow-up after critical illness.** *Critical Care Medicine* 2000, **28**(4):1196.
7. Donnelly JM, Kornblith AB, Fleishman S, Zuckerman E, Raptis G, Hudis CA, Hamilton N, Payne D, Massie MJ, Norton L *et al*: **A pilot study of interpersonal psychotherapy by telephone with cancer patients and their partners.** *Psycho-Oncology* 2000, **9**(1):44-56.
8. Durland SE: **Adult bereavement: A critical review of theories and treatment outcome studies.** *Dissertation Abstracts International: Section B: the Sciences & Engineering* 2000, **60**(9-B):4885.
9. Esplen MJTBHJGGLANSSNBK, and Field B: **A supportive-expressive group intervention for women with a family history of breast cancer: results of a phase ii study.** *Psycho Oncology* 2000, **9**(3):243-252.
10. Fogarty JA: **The magical thoughts of grieving children: Treating children with complicated mourning and advice for parents;** 2000.
11. Forchuk C: **Dealing with a family member who has a mental illness was a long term, frustrating, and confusing process before acceptance occurred... commentary on Karp DA, Tanarugsachock V. Mental illness, caregiving, and emotion management. QUAL HEALTH RES 2000 Jan;10:6-25.** *Evidence-Based Nursing* 2000, **3**(4):133.
12. Fortner BV: **The effectiveness of grief counseling and therapy: A quantitative review.** *Dissertation Abstracts International: Section B: the Sciences & Engineering* 2000, **60**(8-B):4221.
13. Holst-Warhaft G: **The cue for passion: Grief and its political uses;** 2000.
14. Jacobs S, Prigerson H: **Psychotherapy of traumatic grief: a review of evidence for psychotherapeutic treatments.** *Death Studies* 2000, **24**(6):479-495.
15. Johnson BS: **Mothers' perceptions of parenting children with disabilities.** *MCN, American Journal of Maternal Child Nursing* 2000, **25**(3):127-132.
16. Kaunonen M, Tarkka M, Laippala P, Paunonen-Ilmonen M: **The impact of supportive telephone call intervention on grief after the death of a family member.** *Cancer Nursing* 2000, **23**(6):483-491.
17. Loy MJ: **A study of the effectiveness of a camp intervention for bereaved adolescents. (counseling, grief intervention).** *Dissertation Abstracts International* 2000, **60**(7-A):2386.
18. McRae S, Caty S, Nelder M, Picard L: **Palliative care on Manitoulin Island. Views of family caregivers in remote communities.** *Canadian Family Physician* 2000, **46**:1301-1307.

19. Neimeyer RA: **Searching for the meaning of meaning: grief therapy and the process of reconstruction.**[comment]. *Death Studies* 2000, **24**(6):541-558.
20. Partnership for Caring I: **On the shelves.** *VOICES: The newsletter of Partnership for Caring* 2000, **1**(3):8.
21. Patterson PR: **Living with grief after pregnancy loss: Perspectives of African American women.** *Ph.D.*: University of California, San Francisco; 2000.
22. Rich DE: **The impact of postpregnancy loss services on grief outcome: Integrating research and practice in the design of perinatal bereavement programs.** *Illness, Crisis & Loss* 2000, **8**(3):244-264.
23. Schreiber H: **Parents experiencing a perinatal death found that their interactions with social institutions devalued their loss [commentary on Malacrida C. Complicating mourning: the social economy of perinatal death. QUAL HEALTH RES 1999 Jul;9(4):504-19].** *Evidence-Based Nursing* 2000, **3**(1):27.

## 2001 (36)

1. Abe N, Catlin A, Mihara D: **End of life in the NICU. A study of ventilator withdrawal.** *MCN, American Journal of Maternal Child Nursing* 2001, **26**(3):141-146.
2. Armstrong D: **Exploring fathers' experiences of pregnancy after a prior perinatal loss.** *MCN, American Journal of Maternal Child Nursing* 2001, **26**(3):147-153.
3. Campbell BB: **Shattered futures, mended lives: The ritualized mourning of mothers of stillborn babies.** *Dissertation Abstracts International* 2001, **61**(10-A):3825.
4. Colsen TL: **Fathers and perinatal loss: Their conscious and unconscious experiences.** *Dissertation Abstracts International: Section B: the Sciences & Engineering* 2001, **62**(4-B):2051.
5. Curtis K, Newman T: **Do community-based support services benefit bereaved children? A review of empirical evidence.** *Child: Care, Health & Development* 2001, **27**(6):487-495.
6. DiMarco MA, Menke EM, McNamara T: **Evaluating a support group for perinatal loss.** *MCN, American Journal of Maternal Child Nursing* 2001, **26**(3):135-140.
7. Edwards WT, Bylund RA, Wheeler AL: **Race and Complicated Grief among Male Inmates.** In.: Southern Sociological Society; 2001.
8. Fry PS: **Predictors of health-related quality of life perspectives, self-esteem, and life satisfactions of older adults following spousal loss: an 18-month follow-up study of widows and widowers.** *Gerontologist* 2001, **41**(6):787-798.
9. Fry PS: **The unique contribution of key existential factors to the prediction of psychological well-being of older adults following spousal loss.** *Gerontologist* 2001, **41**(1):69-81.

10. Gonzalez Villar M, Madoz Zubillaga MN, Calle Irastorza F, Jurio Burgui JJ, Arillo Crespo A, Fuertes Goni MC: **Support intervention in grieving patients.** *Atencion Primaria* 2001, **27**(2):101-107.
11. Goodkin K, Baldewicz TT, Asthana D, Khamis I, Blaney NT, Kumar M, Burkhalter JE, Leeds B, Shapshak P: **A bereavement support group intervention affects plasma burden of human immunodeficiency virus type 1:report of a randomized controlled trial.** *Journal of Human Virology* 2001, **4**(1):44-54.
12. Guthrie SJ, Hill KM, Muers MF: **Living with severe COPD. A qualitative exploration of the experience of patients in Leeds.** *Respir Med* 2001, **95**(3):196.
13. Hatton R: **Helping people cope with homicide bereavement.** *Dissertation Abstracts International: Section B: the Sciences & Engineering* 2001(10-B):5565.
14. Hilliard RE: **The effects of music therapy-based bereavement groups on mood and behavior of grieving children: a pilot study.** *Journal of Music Therapy* 2001, **38**(4):291-306.
15. Kravetz BE: **Accreditation standards for mental healthcare professionals in the treatment of HIV-positive women with children: A program design (immune deficiency).** *Dissertation Abstracts International: Section B: the Sciences & Engineering* 2001, **61**(8-B):4411.
16. Laakso H, Paunonen-Ilmonen M: **Mothers' grief following the death of a child.** *Journal of Advanced Nursing* 2001, **36**(1):69-77.
17. Lange A, van de Ven JP, Schrieken B, Emmelkamp PM: **Interapy, treatment of posttraumatic stress through the Internet: a controlled trial.** *Journal of Behavior Therapy & Experimental Psychiatry* 2001, **32**(2):73-90.
18. Links P: **Therapists of patients who committed suicide reported a wide range of emotional responses.** *Evidence-Based Mental Health* 2001, **4**(3):96.
19. Massimo L: **[Home care services and the role of "caregivers"].** *Minerva Pediatrica* 2001, **53**(3):161-169.
20. Meuser TM, Marwit SJ: **A comprehensive, stage-sensitive model of grief in dementia caregiving.** *Gerontologist* 2001, **41**(5):658-670.
21. Oliver RC, Sturtevant JP, Scheetz JP, Fallat ME: **Beneficial effects of a hospital bereavement intervention program after traumatic childhood death.** *Journal of Trauma-Injury Infection & Critical Care* 2001, **50**(3):440-446; discussion 447-448.
22. Partnership for Caring I: **Visit our new website.** *VOICES: The newsletter of Partnership for Caring* 2001, **2**(1):8.
23. Piper W, McCallum M, Joyce A, Rosie J, Ogradniczuk J: **Patient personality and time-limited group psychotherapy for complicated grief.** *International Journal of Group Psychotherapy* 2001, **51**(4):525-552.
24. Planavsky LA, Mion LC, Litaker DG, Kippes CM, Mehta N: **Ending a nurse practitioner-patient relationship: uncovering patients' perceptions.** *Journal of the American Academy of Nurse Practitioners* 2001, **13**(9):428-432.
25. Prigerson HG, Jacobs SC: **Perspectives on care at the close of life. Caring for bereaved patients: "all the doctors just suddenly go".** *JAMA* 2001, **286**(11):1369-1376.

26. Rillstone P, Hutchinson SA: **Managing the reemergence of anguish: pregnancy after a loss due to anomalies.** *JOGNN - Journal of Obstetric, Gynecologic, & Neonatal Nursing* 2001, **30**(3):291-298.
27. Ringdal GI, Jordhoy MS, Ringdal K, Kaasa S: **The first year of grief and bereavement in close family members to individuals who have died of cancer.** *Palliative Medicine* 2001, **15**(2):91-105.
28. Ringdal GI, Jordhoy MS, Ringdal K, Kaasa S: **Factors affecting grief reactions in close family members to individuals who have died of cancer.** *J Pain Symptom Manage* 2001, **22**(6):1016.
29. Sakai C, Paperny D, Mathews M, Tanida G, Boyd G, Simons A, Yamamoto C, Mau C, Nutter L: **Thought Field Therapy clinical applications: utilization in an HMO in behavioral medicine and behavioral health services.[comment].** *Journal of Clinical Psychology* 2001, **57**(10):1215-1227.
30. Salloum A, Avery L, McClain RP: **Group psychotherapy for adolescent survivors of homicide victims: a pilot study.** *Journal of the American Academy of Child & Adolescent Psychiatry* 2001, **40**(11):1261-1267.
31. Sanchez NA: **Mothers' perceptions of benefits of perinatal loss support offered at a major university hospital.** *Journal of Perinatal Education* 2001, **10**(2):23-30.
32. Schneider KJ, Bugental JFT, Pierson JF (eds.): **The handbook of humanistic psychology: Leading edges in theory, research, and practice;** 2001.
33. Stewart M, Craig D, MacPherson K, Alexander S: **Promoting positive affect and diminishing loneliness of widowed seniors through a support intervention.** *Public Health Nursing* 2001, **18**(1):54-63.
34. Warner J, Metcalfe C, King M: **Evaluating the use of benzodiazepines following recent bereavement.** *British Journal of Psychiatry* 2001, **178**(1):36-41.
35. Wilson RE: **Parents' support of their other children after a miscarriage or perinatal death.** *Early Human Development* 2001, **61**(2):55-65.
36. Zisook S, Schuchter S, Pedrelli P, Sable J, Deaciuc S: **Bupropion sustained release for bereavement: Results of an open trial.** *Journal of Clinical Psychiatry* 2001, **64**(2):227-230.

## 2002 (18)

1. Birtwistle J, Payne S, Smith P, Kendrick T: **The role of the district nurse in bereavement support.** *Journal of Advanced Nursing* 2002, **38**(5):467-478.
2. Campbell FR: **The influence of an active postvention on the length of time elapsed before survivors of suicide seek treatment.** *Dissertation Abstracts International* 2002, **63**(2-A):753.
3. Cannold L: **Understanding and responding to anti-choice women-centred strategies.** *Reproductive Health Matters* 2002, **10**(19):171-179.
4. Consedine NS, Magai C, Cohen CI, Gillespie M: **Ethnic variation in the impact of negative affect and emotion inhibition on the health of older adults.** *J Gerontol Ser B-Psychol Sci Soc Sci* 2002, **57**(5):P396.

5. Dent A: **Family support after sudden child death.** *Community Practitioner* 2002, **75**(12):469-473.
6. Harkness KL, Shear MK, Frank E, Silberman RA: **Traumatic grief treatment: case histories of 4 patients.** *Journal of Clinical Psychiatry* 2002, **63**(12):1113-1120.
7. Hersen M, Sledge W (eds.): **Encyclopedia of psychotherapy (Vol. 1: A-H).** San Diego, CA: Academic Press.; 2002.
8. Higgins MP: **Parental bereavement and religious factors.** *Omega-J Death Dying* 2002, **45**(2):187.
9. Kitson C: **Fathers experienced stillbirth as a waste of life and needed to protect their partners and express grief in their own way.** *Evidence-Based Nursing* 2002, **5**(2):61.
10. Laumann GM: **The impact of a school-based intervention program on the divorce adjustment of latency-aged children: An evaluation of the Rainbows program.** *Dissertation Abstracts International: Section B: the Sciences & Engineering* 2002, **63**(2-B):1066.
11. Locicero JP: **A comparison of non-certified and certified grief counselors in regard to education, experience, credentials, and supervision.** *Omega-J Death Dying* 2002, **46**(1):5.
12. Marwit SJ, Meuser TM: **Development and initial validation of an inventory to assess grief in caregivers of persons with Alzheimer's disease.** *Gerontologist* 2002, **42**(6):751-765.
13. Mitchell GK: **How well do general practitioners deliver palliative care? A systematic review.** *Palliative Medicine* 2002, **16**(6):457.
14. Rowa-Dewar N: **Do interventions make a difference to bereaved parents? A systematic review of controlled studies.** *International Journal of Palliative Nursing* 2002, **8**(9):452-457.
15. Solomon RM: **Treatment of violated assumptive worlds with EMDR.** In: *Loss of the assumptive world: A theory of traumatic loss The series in trauma and loss.* Edited by Kauffman J. New York, NY: Brunner-Routledge; 2002: 117-126.
16. Stoddart K, Burke L, Temple V: **Outcome evaluation of bereavement groups for adults with intellectual disabilities.** *Journal of Applied Research in Intellectual Disabilities* 2002, **15**:28-35.
17. Utz RL, Carr D, Nesse R, Wortman CB: **The effect of Widowhood on older adults' social participation: Aan evaluation of activity, disengagement, and continuity theories.** *Gerontologist* 2002, **42**(4):522.
18. Wayment HA, Vierthaler J: **Attachment style and bereavement reactions.** *J Loss Trauma* 2002, **7**(2):129.

### 2003 (27)

1. Ahmed N, Ahmedzai S, Vora V, Hillam S, Paz S: *Cochrane Database of Systematic Reviews* 2003, **1**:1.
2. Barlow J, Coren E: *Cochrane Database of Systematic Reviews* 2003, **1**:1.
3. Bower P, Rowland N, Mellor Clark J, Heywood P, Godfrey C, Hardy R: *Cochrane Database of Systematic Reviews* 2003, **1**:1.

4. Chambers HM, Chan FY: **Support for women/families after perinatal death.** In. Oxford: The Cochrane Library; 2003.
5. Churchill R: **Enhanced primary care may encourage remission in depression.** *Evidence-Based Mental Health* 2003, **6**(2):47.
6. Faraclas H-I: **A position paper on the nature of the counseling relationship within the philosophy of neuropathic medicine.** *Townsend Letter for Doctors & Patients* 2003, **Feb/Mar**(235/236):64-66.
7. Foster J, Cole M: *Cochrane Database of Systematic Reviews* 2003, **1**:1.
8. Geron Y, Ginzburg K, Solomon Z: **Predictors of bereaved parents' satisfaction with group support: An Israeli perspective.** *Death Studies* 2003, **27**(5):405.
9. Howarth GR, Alfirevic Z: *Cochrane Database of Systematic Reviews* 2003, **1**:1.
10. Ismail K, McGuire H, Winkley K: *Cochrane Database of Systematic Reviews* 2003, **1**:1.
11. Jefferson TO, Tyrrell D: *Cochrane Database of Systematic Reviews* 2003, **1**:1.
12. Joy CB, Adams CE, Rice K: *Cochrane Database of Systematic Reviews* 2003, **1**:1.
13. Lachs MS, Boyer P: **Timing the talk.** *Prevention* 2003, **55**(1):154-156.
14. Lumley J, Watson L, Watson M, Bower C: *Cochrane Database of Systematic Reviews* 2003, **1**:1.
15. Merry S, McDowell H, Hetrick S, Bir J, Muller N: *Cochrane Database of Systematic Reviews* 2003, **1**:1.
16. Reviews NHSCf, Dissemination: **Psychological treatment of depression in children and adolescents.** *Database of Abstracts of Reviews of Effectiveness* 2003, **1**:1.
17. Reviews NHSCf, Dissemination: **Patient and carer preference for, and satisfaction with, specialist models of palliative care.** *Database of Abstracts of Reviews of Effectiveness* 2003, **1**:1.
18. Reviews NHSCf, Dissemination: **Literature review to inform purchasing of counselling in general practice (Structured abstract).** *Database of Abstracts of Reviews of Effectiveness* 2003, **1**:1.
19. Reviews NHSCf, Dissemination: **Do hospital-based palliative teams improve care for patients or families at the end of life? (Structured abstract).** *Database of Abstracts of Reviews of Effectiveness* 2003, **1**:1.
20. Reviews NHSCf, Dissemination: **The effectiveness of therapeutic touch.** *Database of Abstracts of Reviews of Effectiveness* 2003, **1**:1.
21. Reviews NHSCf, Dissemination: **The impact of different models of specialist palliative care on patients' quality of life.** *Database of Abstracts of Reviews of Effectiveness* 2003, **1**:1.
22. Reviews NHSCf, Dissemination: **An integrative review and meta-analysis of therapeutic touch research (Structured abstract).** *Database of Abstracts of Reviews of Effectiveness* 2003, **1**:1.
23. Rose S, Bisson J, Wessely S: *Cochrane Database of Systematic Reviews* 2003, **1**:1.
24. Rumbold A, Crowther CA: *Cochrane Database of Systematic Reviews* 2003, **1**:1.
25. Scott JR: *Cochrane Database of Systematic Reviews* 2003, **1**:1.

26. Stroebe M, Strobe W, Schut H: **Bereavement research: methodological issues and ethical concerns.** *Palliative Medicine* 2003, **17**(3):235-240.
27. Van P, Meleis AI: **Coping with grief after involuntary pregnancy loss: perspectives of African American women.** *JOGNN - Journal of Obstetric, Gynecologic, & Neonatal Nursing* 2003, **32**(1):28-39.

**1988-89** (1)

1. Sabatini L: **Evaluating a treatment program for newly widowed people.** *Omega* 1988-89, **19**(3):229-237.
